# Supplementary material
Source: MDPI journal article supplement (https://www.mdpi.com/2076-3417/11/17/8217)
Supplement: s1 [file s1 › applsci-1357587-supplementary.pdf]

## SUPPLEMENTARY MATERIAL

### EVALUATION OF ROASTING EFFECT ON GREEN TEA SELECTED VOLATILE FLAVOR COMPOUNDS AND PYRAZINES CONTENT BY HS-SPME GC-MS

Roberto Gotti<sup>1</sup>, Alberto Leoni<sup>1</sup>, Jessica Fiori,<sup>2</sup>

<sup>1</sup> Department of Pharmacy and Biotechnology, University of Bologna, Via Belmeloro 6, 40126 Bologna, Italy

<sup>2</sup> Department of Chemistry “G. Ciamician”, University of Bologna, Via Selmi 2, 40126 Bologna, Italy

**Table S1** List of the commercially available green teas and black teas.

| <i>Green tea</i> |              |           | <i>Black tea</i> |
|------------------|--------------|-----------|------------------|
| Bancha           | Jasmine      | Dong yang | Ceylon           |
| Bancha Hojicha   | White monkey | Mao feng  | Pagoda           |
| Sencha Ariake    | Jade needle  | Xiang     |                  |
| Sencha Fukujyu   | Pagoda       | Xialongao |                  |
| Ceylon           | Chungmee     | Fkagoza   |                  |
| Gun powder       | Mu dan       | Silvery   |                  |
| Genmaicha        | Lu Mu Dan    |           |                  |
| Osmanthus        | Gyokuro      |           |                  |

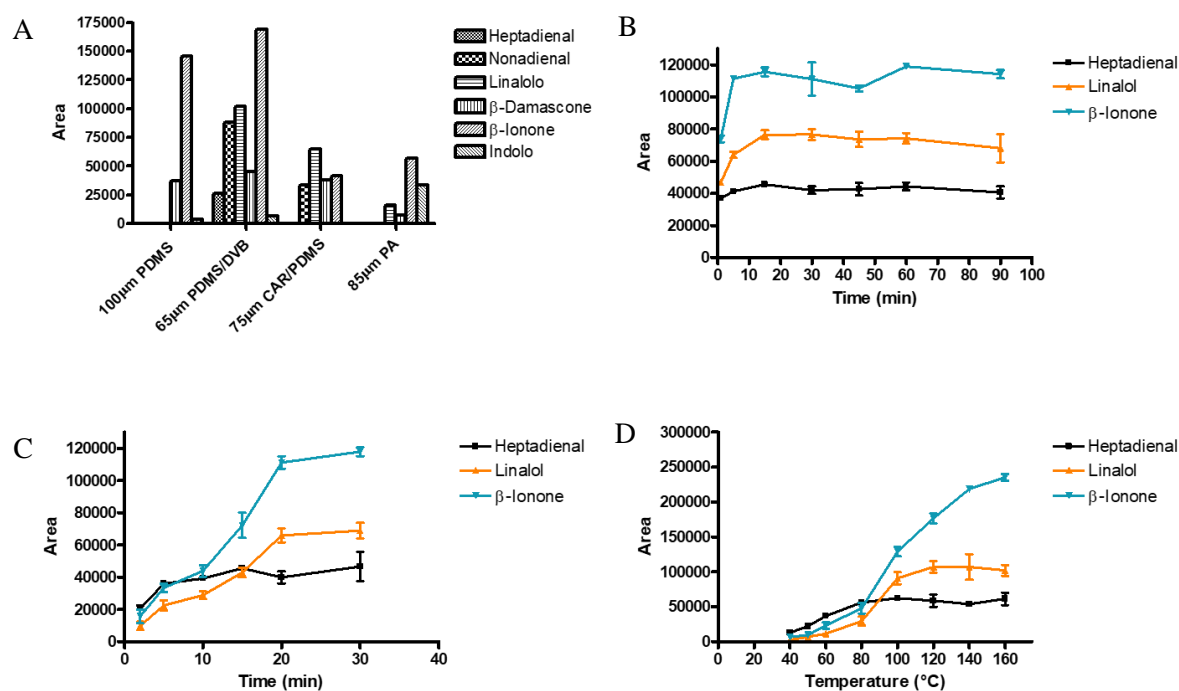

**Figure S1.** HS-SPME optimization. A) Effects of the fibre extraction efficacy on the peak area of six representative VOCs. HS-SPME Conditions: sample 1 mL of tea infusion, extraction time 20 min, temperature 100  $^{\circ}$ C, stirring rate 400 rpm. The applied GC-MS conditions are described in the Experimental section. Effects of HS-SPME equilibration time (B), extraction time (C) and temperature (D) on the peak area of three representative VOCs. HS-SPME Conditions: sample 1 mL of tea infusion, variable extraction time and temperature, stirring rate 400 rpm. The applied GC-MS conditions are described in the Experimental section.

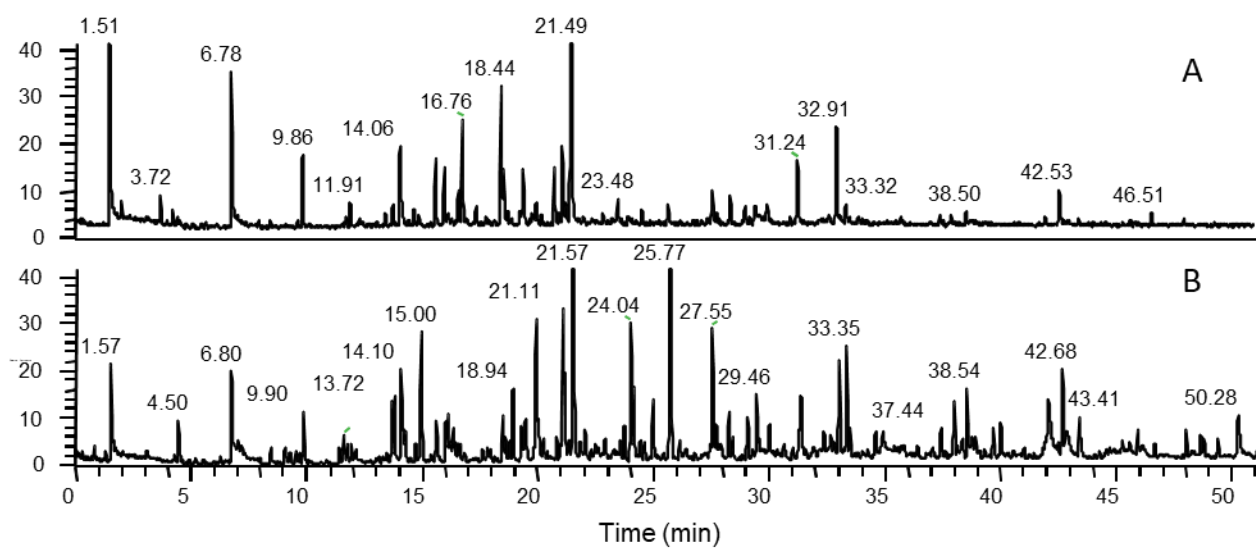

**Figure S2** TIC chromatograms on ZB5 column of a representative tea (Bancha) before (A) and after (B) roasting. Chromatographic conditions: initial 40°C (hold time: 1 min), then ramped by 3°C/min to 220°C (hold time: 10 min), helium gas flow rate 1 mL/min.
